# Supplementary material for: Influence of Chronic Exposure to Exercise on Heart Rate Variability in Children and Adolescents Affected by Obesity: A Systematic Review and Meta-Analysis
Source: MDPI journal article supplement (doi:10.3390/ijerph182111065), 2021-10-21
Supplement: s1 [file s1]

**Table S1.** Search Strategy.

| <i>Mesh<br/>Terms</i>        | <i>Database</i>                | <i>Combination</i>                                              | <i>Search strategy</i>                                                                                                                                                                                                                                                                                                                                                                                                                                                           |
|------------------------------|--------------------------------|-----------------------------------------------------------------|----------------------------------------------------------------------------------------------------------------------------------------------------------------------------------------------------------------------------------------------------------------------------------------------------------------------------------------------------------------------------------------------------------------------------------------------------------------------------------|
|                              | Embase<br>(Elsevier)           | Heart Rate<br>Variability AND                                   | Search strategy 1: ('heart rate variability'/exp OR 'heart rate variability' OR (('heart'/exp OR heart) AND rate AND ('variability'/exp OR variability))) AND ('exercise'/exp OR exercise) AND ('obesity'/exp OR obesity) AND ('child'/exp OR child OR 'children'/exp OR children OR 'adolescent'/exp OR adolescent OR 'adolescents'/exp OR adolescents);<br>Search strategy 2: heart AND rate AND variability AND exercise AND (pediatric AND obesity OR childhood) AND obesity |
|                              | Ovid                           | Exercise AND<br>Obesity AND<br>(Child OR<br>Children OR         | Search strategy 1- (Heart Rate Variability and Exercise and Obesity and (Child or Children or Adolescent or Adolescents)).mp. [mp=title, abstract, full text, caption text]<br>Search strategy 2- (Heart Rate Variability and Exercise and (Pediatric Obesity or Childhood Obesity)).mp. [mp=title, abstract, full text, caption text]                                                                                                                                           |
|                              | Medline<br>Complete<br>(EBSCO) | Adolescent OR<br>Adolescents);<br>Heart Rate<br>Variability AND | Search strategy 1- Heart Rate Variability AND Exercise AND Obesity AND (Child OR Children OR Adolescent OR Adolescents)<br>Search strategy 2- Heart Rate Variability AND Exercise AND (Pediatric Obesity OR Childhood Obesity)                                                                                                                                                                                                                                                   |
|                              | Scopus<br>(Elsevier)           | Exercise AND<br>(Pediatric<br>Obesity OR<br>Childhood           | Search strategy 1- TITLE-ABS-KEY (heart AND rate AND variability AND exercise AND obesity AND (child OR children OR adolescent OR adolescents))<br>Search strategy 2- TITLE-ABS-KEY (heart AND rate AND variability AND exercise AND (pediatric AND obesity OR childhood AND obesity))                                                                                                                                                                                           |
|                              | PubMed                         | Obesity)                                                        | Search strategy 1: (("heart rate"[MeSH Terms] OR ("heart"[All Fields] AND "rate"[All Fields]) OR "heart rate"[All Fields]) AND Variability[All Fields]) AND ("exercise"[MeSH Terms] OR "exercise"[All Fields]) AND ("obesity"[MeSH Terms] OR "obesity"[All Fields]) AND (("child"[MeSH Terms] OR "child"[All Fields]) OR ("child"[MeSH Terms] OR "child"[All Fields]                                                                                                             |
| Heart<br>Rate<br>Variability |                                |                                                                 |                                                                                                                                                                                                                                                                                                                                                                                                                                                                                  |

|                                                                                                                                           |                  |                                                                                                                                                                                                                                                                                                                                                                                                                                                                                                                                                                             |
|-------------------------------------------------------------------------------------------------------------------------------------------|------------------|-----------------------------------------------------------------------------------------------------------------------------------------------------------------------------------------------------------------------------------------------------------------------------------------------------------------------------------------------------------------------------------------------------------------------------------------------------------------------------------------------------------------------------------------------------------------------------|
| ; Exercise;<br>Obesity;<br>Child;<br>Children;<br>Adolescent<br>t;<br>Adolescent<br>ts;<br>Pediatric<br>Obesity;<br>Childhood<br>Obesity. |                  | OR "children"[All Fields]) OR ("adolescent"[MeSH Terms] OR "adolescent"[All Fields]) OR ("adolescent"[MeSH Terms] OR "adolescent"[All Fields] OR "adolescents"[All Fields]))                                                                                                                                                                                                                                                                                                                                                                                                |
|                                                                                                                                           |                  | Search strategy 2: (("heart rate"[MeSH Terms] OR ("heart"[All Fields] AND "rate"[All Fields]) OR "heart rate"[All Fields]) AND Variability[All Fields]) AND ("exercise"[MeSH Terms] OR "exercise"[All Fields]) AND (("pediatric obesity"[MeSH Terms] OR ("pediatric"[All Fields] AND "obesity"[All Fields]) OR "pediatric obesity"[All Fields]) OR ("pediatric obesity"[MeSH Terms] OR ("pediatric"[All Fields] AND "obesity"[All Fields]) OR "pediatric obesity"[All Fields]) OR ("childhood"[All Fields] AND "obesity"[All Fields]) OR "childhood obesity"[All Fields])). |
|                                                                                                                                           | BVS              | Search strategy 1: Heart Rate Variability AND Exercise AND Obesity AND (Child OR Children OR Adolescent OR Adolescents);<br><br>Search strategy 2: heart rate variability AND exercise AND (pediatric obesity OR childhood obesity)                                                                                                                                                                                                                                                                                                                                         |
|                                                                                                                                           | Cochrane Library | Search strategy 1: Heart Rate Variability AND Exercise AND Obesity AND (Child OR Children OR Adolescent OR Adolescents) in Title Abstract Keyword - (Word variations have been searched);<br><br>Search strategy 2: Heart Rate Variability AND Exercise AND (Pediatric Obesity OR Childhood Obesity) in Title Abstract Keyword - (Word variations have been searched).                                                                                                                                                                                                      |
|                                                                                                                                           | WOS              | Search strategy 1: (Heart Rate Variability AND Exercise AND Obesity AND (Child OR Children OR Adolescent OR Adolescents)).<br><br>Allotted time: Every year. Indices: SCI-EXPANDED, SSCI, A&HCI, CPCI-S, CPCI-SSH, ESCI;<br>Search strategy 2:(Heart Rate Variability AND Exercise AND (Pediatric Obesity OR Childhood Obesity)).<br><br>Allotted time: Every year. Indices: SCI-EXPANDED, SSCI, A&HCI, CPCI-S, CPCI-SSH, ESCI.                                                                                                                                             |

Legend: BVS: Virtual Health Library; WOS: Web of Science; MeSH: Medical Subject Headings; SCI-EXPANDED: Science Citation Index Expanded; SSCI: Social Sciences Citation Index; A&HCI: Arts & Humanities Citation Index; CPCI-S: Conference Proceedings Citation Index - Science; CPCI-SSH: Conference Proceedings Citation Index - Social Sciences & Humanities; ESCI: Emerging Sources Citation Index.
